# Supplementary material
Source: Springer Nature journal article supplement (https://www.springermedizin.de/resource/supplementary/12889_2011_3892_MOESM1_ESM.pdf/9490818)

Mean serum 25(OH)D

level (nmol/L)

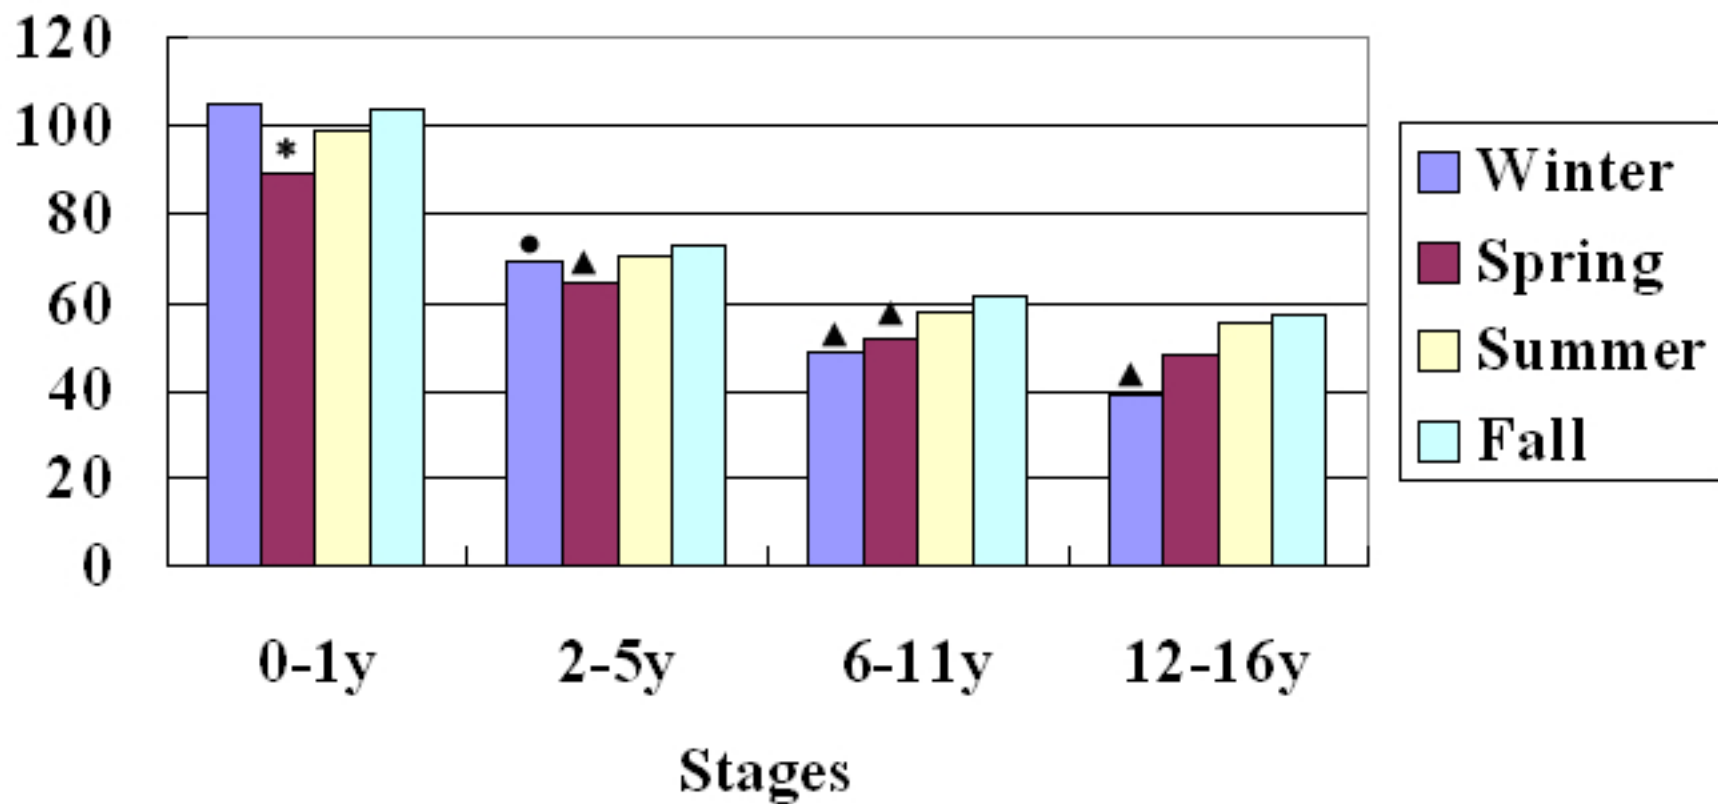

Supplement: MOESM1 [file 9490818]
